# Supplementary material
Source: PubMed Central journal article supplement (PMC6456561)
Supplement: ajtr0011-1835-f5.pdf [file ajtr0011-1835-f5.pdf]

## LINC00341/miR-214/FOXO4 promotes the VSMCs

**Table S1.** Primers sequences for qRT-PCR and sequences of siRNA

|                   | Sequences                                                                     |
|-------------------|-------------------------------------------------------------------------------|
| si-LINC00341-1#   | 5'-GTGACTTAAACAGCTTAAATT-3'                                                   |
| si-LINC00341-2#   | 5'-TAAACAGTGACTTTAAATTGT-3'                                                   |
| si-LINC00341-3#   | 5'-CATAAATTCTGAAATTAGTT-3'                                                    |
| miR-214           | Forward, 5'-TGTGATGAAAGACGGCACAC-3'<br>Reverse, 5'-CTTCCTTTGGGTATTGTTTGG-3'   |
| FOXO4             | Forward, 5'-CCTCAGACTCCGTAATGTG-3'<br>Reverse, 5'-CCGGGATTGTCAGATAGG-3'       |
| LINC00341         | Forward, 5'-AGAGAATGGAGAGTGAGGCTACC-3'<br>Reverse, 5'-CCAGGCATGGACAGAGGGAT-3' |
| miR-214 inhibitor | 5'-ACGGAUUCUGGGAAAACUGGAC-3'                                                  |
| miR-214 mimics    | 5'-GTCCAGTTTTCCAGGAATCCCT-3'                                                  |
| GAPDH             | Forward, 5'-AGAAGGCTGGGGCTCATTG-3'<br>Reverse, 5'-AGGGGCCATCCACAGTCTTC-3'     |
